# Supplementary material for: Upregulation of PITX2 Promotes Letrozole Resistance Via Transcriptional Activation of IFITM1 Signaling in Breast Cancer Cells
Source: PubMed Central journal article supplement — Cancer Res Treat. 2018 Jul 18;51(2):576–92. doi: 10.4143/crt.2018.100 (PMC6473270; doi:10.4143/crt.2018.100), 2018-07-18
Supplement: crt-2018-100-suppl1.pdf [file crt-2018-100-suppl1.pdf]

**S1 Table.** Clinical characteristics of the breast cancer patients recruited in the present study

|                                     | <b>No. of patients (%) (n=44)</b> |
|-------------------------------------|-----------------------------------|
| <b>Age (yr)</b>                     |                                   |
| ≤ 50                                | 13 (29.5)                         |
| > 50                                | 31 (70.5)                         |
| <b>Macroscopic tumor size (mm)</b>  |                                   |
| ≤ 30                                | 19 (43.2)                         |
| > 30                                | 25 (56.8)                         |
| <b>Lymph node status</b>            |                                   |
| ≤ 3 involved                        | 30 (68.2)                         |
| > 3 involved                        | 14 (31.8)                         |
| <b>Scarff-Bloom-Richardson</b>      |                                   |
| 1                                   | 5 (11.4)                          |
| 2                                   | 13 (29.5)                         |
| 3                                   | 26 (59.1)                         |
| <b>Estrogen receptor status</b>     |                                   |
| Positive                            | 42 (95.5)                         |
| Negative                            | 2 (4.5)                           |
| <b>Progesterone receptor status</b> |                                   |
| Positive                            | 25 (56.8)                         |
| Negative                            | 19 (43.2)                         |
| <b>HER2 status</b>                  |                                   |
| Positive                            | 28 (63.6)                         |
| Negative                            | 16 (36.4)                         |
