# Supplementary material for: Upregulation of PITX2 Promotes Letrozole Resistance Via Transcriptional Activation of IFITM1 Signaling in Breast Cancer Cells
Source: PubMed Central journal article supplement — Cancer Res Treat. 2018 Jul 18;51(2):576–92. doi: 10.4143/crt.2018.100 (PMC6473270; doi:10.4143/crt.2018.100), 2018-07-18
Supplement: crt-2018-100-suppl2.pdf [file crt-2018-100-suppl2.pdf]

**S2 Table.** Primers for RT-qPCR and ChIP-qPCR

| Primer name | Sequence (5'→3' )               |
|-------------|---------------------------------|
| PITX2-Fw    | ACTTTACCAGCCAGCAGCTC            |
| PITX2-Rev   | GGGTACATGTCGTCGTAGGG            |
| 18S-Fw      | CTCGCCGCGCTCTACCTACCTA          |
| 18S-Rev     | ATGAGCCATTCGCAGTTTCACTGTA       |
| IFNA1-Fw    | CTCATACACCAGGTCACGCT            |
| IFNA1-Rev   | AGTGTAAGGTGCACATGACG            |
| IFITM1-Fw   | GGATTTTCGGCTTGTCCCGAG           |
| IFITM1-Rev  | CCATGTGGAAGGGAGGGCTC            |
| ChIP-P1-Fw  | AGGTGGTTTCAGTTCCATGCCTGC        |
| ChIP-P1-Rev | GCCACACATCACTGCGGAGTG           |
| ChIP-P2-Fw  | GAATTGCTGGGACCCGGAAGGTA         |
| ChIP-P2-Rev | GAGAACTGACTCCCCAGAGGGTAGT       |
| ChIP-P3-Fw  | TGAACCGGGACAGTGAGGTC            |
| ChIP-P3-Rev | CTCAAGTCAGGACTAGTGACTTCCTAAGTGT |

RT-qPCR, quantitative reverse transcription polymerase chain reaction; ChIP, chromatin immunoprecipitation; qPCR, quantitative polymerase chain reaction.
