# Supplementary material for: Upregulation of PITX2 Promotes Letrozole Resistance Via Transcriptional Activation of IFITM1 Signaling in Breast Cancer Cells
Source: PubMed Central journal article supplement — Cancer Res Treat. 2018 Jul 18;51(2):576–92. doi: 10.4143/crt.2018.100 (PMC6473270; doi:10.4143/crt.2018.100), 2018-07-18
Supplement: crt-2018-100-suppl3.pdf [file crt-2018-100-suppl3.pdf]

**S3 Table.** Sources of antibodies and the working dilutions that were used in the current study

| <b>Antibody</b>                                      | <b>Vendors</b>                             | <b>Catalog No.</b> | <b>Dilutions</b>                          |
|------------------------------------------------------|--------------------------------------------|--------------------|-------------------------------------------|
| Rabbit anti-PITX2                                    | CST (Shanghai, China)                      | ab32832            | 1:1,000 (WB)<br>1:200 (IHC)<br>1:300 (IF) |
| Goat anti-PITX2                                      | Santa Cruz Biotechnology (Shanghai, China) | sc-390457          | 2 $\mu$ g/reaction (IP)                   |
| Rabbit anti-His                                      | Sigma-Aldrich (Shanghai, China)            | SAB1306084         | 1:1,500                                   |
| Rabbit anti-p-AKT                                    | CST (Shanghai, China)                      | #9271              | 1:1,000                                   |
| Rabbit anti-AKT                                      | CST (Shanghai, China)                      | #4691              | 1:3,000                                   |
| Rabbit anti-IRF-7                                    | CST (Shanghai, China)                      | #4920              | 1:1,000                                   |
| Goat anti-IFITM1                                     | R&D Systems (Shanghai, China)              | NP003632           | 1:1,000 (IB)<br>1:200 (IF)                |
| Rabbit anti- $\beta$ -ACTIN                          | Thermo Fisher Scientific (Shanghai, China) | PA1-46296          | 1:3,000                                   |
| Rabbit anti-IFNAR                                    | Millipore (Temecula, CA)                   | 04-151             | 5 $\mu$ g/mL (NT)                         |
| Goat anti-Rabbit IgG-HRP secondary antibody          | Abcam, (Hangzhou, China)                   | ab97200            | 1:10,000                                  |
| Donkey Anti-Goat Cy3 secondary antibody              | Millipore (Temecula, CA)                   | AP180C             | 1:1,000                                   |
| Goat Anti-Rabbit Alexa Fluor® 488 secondary antibody | Abcam, (Hangzhou, China)                   | ab150077           | 1:1,000                                   |
