# Supplementary material for: Upregulation of PITX2 Promotes Letrozole Resistance Via Transcriptional Activation of IFITM1 Signaling in Breast Cancer Cells
Source: PubMed Central journal article supplement — Cancer Res Treat. 2018 Jul 18;51(2):576–92. doi: 10.4143/crt.2018.100 (PMC6473270; doi:10.4143/crt.2018.100), 2018-07-18
Supplement: crt-2018-100-suppl5.pdf [file crt-2018-100-suppl5.pdf]

**A**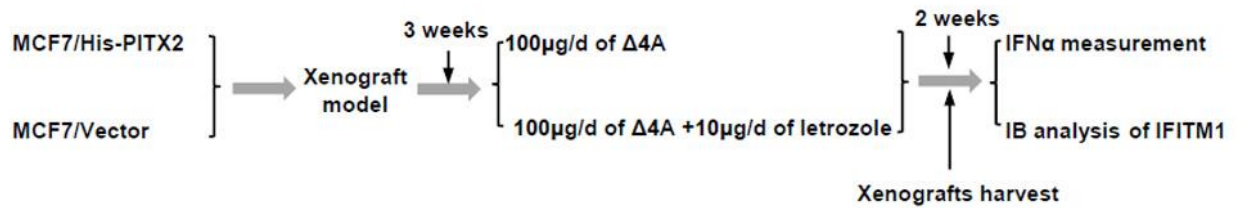**B**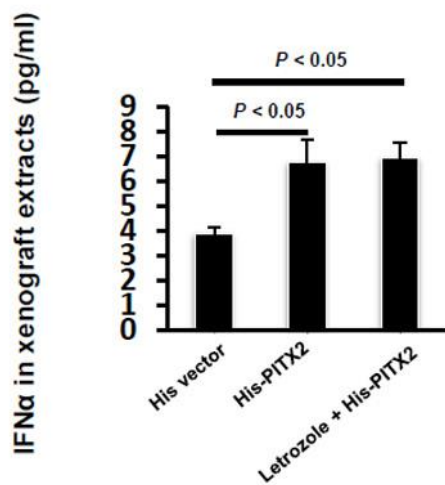**C**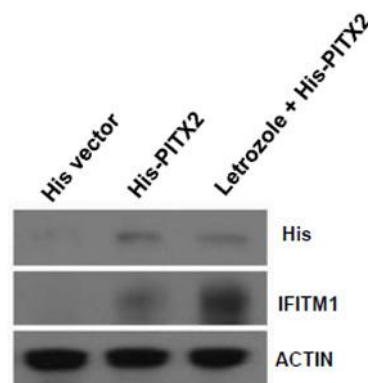

**S5 Fig.** Effects of paired-like homeodomain transcription factor 2 (PITX2) overexpression and letrozole treatment on interferon  $\alpha$  and IFITM1 expression levels were determined using a xenograft nude mouse model using MCF7 cells. (A) Schematic representation of the experimental procedure used in the xenograft nude mouse study. MCF7 cells with different transfections were resuspended in Matrigel (10 mg/mL). 0.1 mL of cell suspension ( $2 \times 10^7$  cells/mL) were then injected into left flanks of female nude mice. Four weeks after cells inoculation, mice were injected subcutaneously with vehicle, 100  $\mu$ g/day of  $\Delta$ 4A, or  $\Delta$ 4A plus 10  $\mu$ g/day of letrozole on a daily basis, for 14 days. The xenograft tissues were then harvested and subjected to other assays. (B) Enzyme-linked immunosorbent assay analysis of baseline expression of interferon  $\alpha$  (IFN $\alpha$ ) in the extracts from xenograft tissues. The results were presented as the mean  $\pm$  standard error of mean of the triplicate samples. (C) Western blotting analysis of IFITM1 expression levels in the harvested xenograft tissues. Actin served as the loading control.
