# Supplementary material for: Upregulation of PITX2 Promotes Letrozole Resistance Via Transcriptional Activation of IFITM1 Signaling in Breast Cancer Cells
Source: PubMed Central journal article supplement — Cancer Res Treat. 2018 Jul 18;51(2):576–92. doi: 10.4143/crt.2018.100 (PMC6473270; doi:10.4143/crt.2018.100), 2018-07-18
Supplement: crt-2018-100-suppl6.pdf [file crt-2018-100-suppl6.pdf]

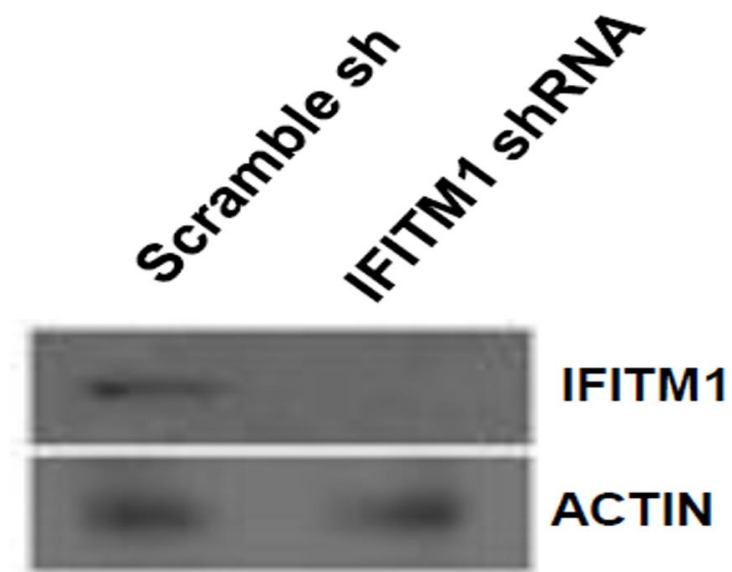

**S6 Fig.** Establishment of MCF7/LR cells stably deprived of endogenous IFITM1 expression. MCF7/LR cells were transfected with IFITM1 shRNA or scramble shRNA (Santa Cruz Biotechnology, Shanghai, China) using Lipofectamine 3000. One day after transfection, the transfected cells were selected with 1.0  $\mu\text{g}/\text{mL}$  puromycin (Sigma-Aldrich) for 2-3 weeks. The stable ablation of IFITM1 expression was finally determined using Western blotting analysis.
