# Supplementary material for: Upregulation of PITX2 Promotes Letrozole Resistance Via Transcriptional Activation of IFITM1 Signaling in Breast Cancer Cells
Source: PubMed Central journal article supplement — Cancer Res Treat. 2018 Jul 18;51(2):576–92. doi: 10.4143/crt.2018.100 (PMC6473270; doi:10.4143/crt.2018.100), 2018-07-18
Supplement: crt-2018-100-suppl9.pdf [file crt-2018-100-suppl9.pdf]

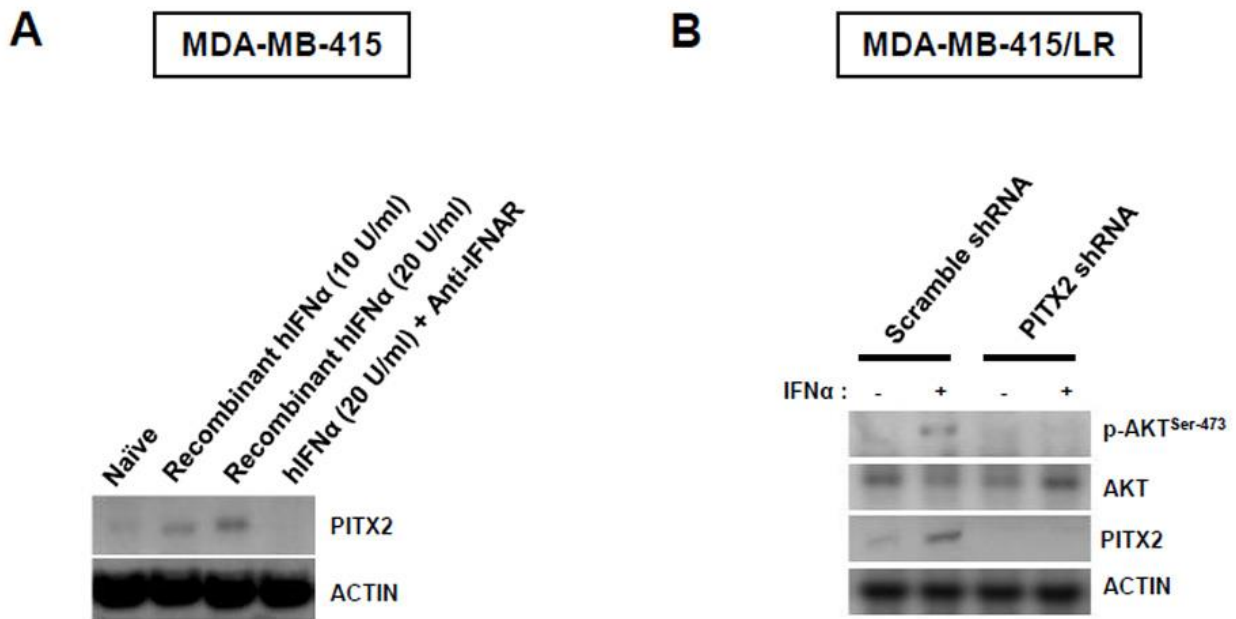

**S9 Fig.** Involvement of interferon  $\alpha$  (IFN $\alpha$ ) signaling pathway in the regulation of paired-like homeodomain transcription factor 2 (PITX2) activation in MDA-MB-415 cells. (A) MDA-MB-415 cells were challenged for 24 hours with a gradual concentration of recombinant hIFN $\alpha$  protein, in the presence or absence of the pretreatment with 5  $\mu$ g/mL of anti-IFNAR neutralizing antibody for 4 hours. PITX2 expression was then determined using Western blotting. Actin served as the loading control. (B) MDA-MB-415/LR cells with different transfections were challenged with 20 U/mL of recombinant hIFN $\alpha$  protein for 24 hours, followed by Western blotting analysis of p-AKTSer-473, AKT, and PITX2 expression.
